# Supplementary material for: Improved Applicability and Diagnostic Accuracy of the Novel Spleen-Dedicated Transient Elastography Device for High-Risk Esophageal Varices
Source: MDPI journal article supplement (doi:10.3390/diagnostics14070743), 2024-03-30
Supplement: s1 [file s1]

**Supplementary table 1.** Univariate and multivariate logistic regression model assessing independent predictors associated with the SSM> 40.9 kPa (as the indicator of presence of critical varices) in our cohort of patient (N=112). **Abbreviations:** ALBI: albumin-bilirubin score; ALT: alanine aminotransferase; AST: aspartate aminotransferase; APRI: AST to Platelet Ratio Index; BMI: body mass index; CAP: continuous attenuation parameter; dB/m: decibels per meter; CI: confidence interval; ECOG: Eastern Cooperative Oncology Group; FIB-4: Fibrosis-4; GGT: gamma glutamyl transferase; g/L: grams per liter; INR: international normalised ratio; IQR: interquartile range; kPa: kilopascal; LSM: liver stiffness measurement; M: median; MELD: model of end-stage liver disease; µmol/L: micromoles per liter; mmol/L: millimoles per liter; N: number; MASLD: Metabolic dysfunction-associated steatotic liver disease; PBC: primary biliary cholangitis; SSM: spleen stiffness measurement; U/L: units per liter

| <b>Dependent variable: SSM&gt;40.9 kPa</b>    | <b>Odds ratio (univariate)</b> | <b>95% CI</b>        |
|-----------------------------------------------|--------------------------------|----------------------|
| <b>Independent variables</b>                  |                                |                      |
| Age, years, median [IQR]                      | 1.012                          | 0.979-1.046          |
| Age at time of diagnosis, years, median [IQR] | 1.005                          | 0.968-1.044          |
| Male sex                                      | <b>3.312</b>                   | <b>1.329-8.251</b>   |
| BMI, kg/m <sup>2</sup> , median [IQR]         | 1.040                          | 0.956-1.132          |
| ECOG                                          |                                |                      |
| 0                                             | Ref.                           |                      |
| 1                                             | 3.096                          | 0.612-15.658         |
| 2                                             | 0.885                          | 0.054-14.549         |
| Obesity (BMI>30 kg/m <sup>2</sup> )           | 1.731                          | 0.745-4.032          |
| Arterial hypertension                         | 0.759                          | 0.350-1.645          |
| Hyperlipidemia                                | 0.757                          | 0.325-1.755          |
| Diabetes type II                              | 1.128                          | 0.522-2.437          |
| Charlson Comorbidity Index                    | 1.667                          | 0.982-1.386          |
| Etiology- Alcohol                             | 1.318                          | 0.620-2.803          |
| Etiology- MASLD                               | 0.840                          | 0.344-2.049          |
| Esophageal varices                            | <b>16.260</b>                  | <b>6.137-43.084</b>  |
| Critical varices                              | <b>26.400</b>                  | <b>3.407-204.562</b> |
| Leukocytes, G/L, median [IQR]                 | <b>0.756</b>                   | <b>0.625-0.914</b>   |
| Neutrophils, G/L, median [IQR]                | <b>0.749</b>                   | <b>0.590-0.950</b>   |
| Lymphocytes, G/L, median [IQR]                | <b>0.286</b>                   | <b>0.147-0.568</b>   |

|                                               |              |                     |
|-----------------------------------------------|--------------|---------------------|
| Neutrophile to lymphocyte ratio, median [IQR] | 1.150        | 0.872-1.516         |
| Hemoglobin, g/L, median [IQR]                 | 0.993        | 0.976-1.011         |
| Platelets, G/L, median [IQR]                  | <b>0.982</b> | <b>0.974-0.990</b>  |
| INR, median [IQR]                             | <b>7.494</b> | <b>1.252-44.856</b> |
| Bilirubin, $\mu$ mol/L, median [IQR]          | 1.008        | 0.989-1.026         |
| Creatinine, $\mu$ mol/L, median [IQR]         | 1.001        | 0.983-1.019         |
| Sodium, U/L, median [IQR]                     | 1.078        | 0.941-1.235         |
| AST, U/L, median [IQR]                        | 1.002        | 0.996-1.009         |
| ALT, U/L, median [IQR]                        | 0.999        | 0.989-1.008         |
| GGT, U/L, median [IQR]                        | 1.000        | 0.999-1.001         |
| Albumins, g/L, median [IQR]                   | <b>0.865</b> | <b>0.803-0.932</b>  |
| Child Pugh score, points, median [IQR]        | 1.363        | 0.937-1.981         |
| MELD, points, median [IQR]                    | 1.092        | 0.979-1.218         |
| FIB-4, points, median [IQR]                   | <b>1.359</b> | <b>1.133-1.630</b>  |
| APRI, points, median [IQR]                    | <b>1.474</b> | <b>1.008-2.154</b>  |
| ALBI, points, median [IQR]                    | <b>3.934</b> | <b>1.915-8.084</b>  |
| Spleen length, mm, median [IQR]               | <b>1.039</b> | <b>1.018-1.060</b>  |
| LSM, kPa, median [IQR]                        | <b>1.068</b> | <b>1.036-1.102</b>  |
| CAP, dB/m, median [IQR]                       | 0.998        | 0.992-1.004         |

**Supplementary table 2.** Univariate and multivariate logistic regression model assessing independent predictors associated with the SSM> 41.8 kPa (as the indicator of presence of critical varices) using old Fibroscan software (N=51). **Abbreviations:** ALBI: albumin-bilirubin score; ALT: alanine aminotransferase; AST: aspartate aminotransferase; APRI: AST to Platelet Ratio Index; BMI: body mass index; CAP: continuous attenuation parameter; dB/m: decibels per meter; CI: confidence interval; ECOG: Eastern Cooperative Oncology Group; FIB-4: Fibrosis-4; GGT: gamma glutamyl transferase; g/L: grams per liter; INR: international normalised ratio; IQR: interquartile range; kPa: kilopascal; LSM: liver stiffness measurement; M: median; MELD: model of end-stage liver disease;  $\mu$ mol/L: micromoles per liter; mmol/L: millimoles per liter; N: number; MASLD: Metabolic dysfunction-associated steatotic liver disease; PBC: primary biliary cholangitis; SSM: spleen stiffness measurement; U/L: units per liter

| <b>Dependent variable:<br/>SSM&gt;41.8 kPa</b> | <b>Odds ratio<br/>(univariate)</b> | <b>95% CI</b>        |
|------------------------------------------------|------------------------------------|----------------------|
| <b>Independent variables</b>                   |                                    |                      |
| Age, years, median [IQR]                       | 1.013                              | 0.968-1.061          |
| Age at time of diagnosis, years, median [IQR]  | 1.007                              | 0.950-1.067          |
| Male sex                                       | 3.231                              | 0.776-13.446         |
| BMI, kg/m <sup>2</sup> , median [IQR]          | 1.118                              | 0.956-1.308          |
| ECOG<br>0<br>1<br>2                            | Ref.<br>2.16<br>Not enough data    | 0.207-22.489         |
| Obesity (BMI>30 kg/m <sup>2</sup> )            | 3.117                              | 0.745-13.037         |
| Arterial hypertension                          | 0.731                              | 0.229-2.334          |
| Hyperlipidemia                                 | 0.615                              | 0.110-3.427          |
| Diabetes type II                               | 0.724                              | 0.220-2.378          |
| Charlson Comorbidity Index                     | 1.031                              | 0.822-1.293          |
| Etiology- Alcohol                              | 1.235                              | 0.395-3.864          |
| Etiology- MASLD                                | 0.577                              | 0.143-2.323          |
| Esophageal varices                             | <b>29.467</b>                      | <b>6.214-139.732</b> |
| Critical varices                               | <b>13.722</b>                      | <b>1.625-115.9</b>   |
| Leukocytes, G/L, median [IQR]                  | <b>0.671</b>                       | <b>0.488-0.924</b>   |
| Neutrophils, G/L, median [IQR]                 | <b>0.623</b>                       | <b>0.422-0.920</b>   |
| Lymphocytes, G/L, median [IQR]                 | <b>0.349</b>                       | <b>0.139-0.882</b>   |

|                                               |              |                     |
|-----------------------------------------------|--------------|---------------------|
| Neutrophile to lymphocyte ratio, median [IQR] | 0.963        | 0.645-1.436         |
| Hemoglobin, g/L median [IQR]                  | 1.023        | 0.993-1.053         |
| Platelets, G/L, median [IQR]                  | 0.977        | 0.965-0.989         |
| INR, median [IQR]                             | 2.239        | 0.265-18.942        |
| Bilirubin, $\mu$ mol/L, median [IQR]          | <b>1.066</b> | <b>1.0001-1.137</b> |
| Creatinine, $\mu$ mol/L, median [IQR]         | <b>0.966</b> | <b>0.936-0.998</b>  |
| Sodium, U/L, median [IQR]                     | 1.204        | 0.961-1.509         |
| AST, U/L, median [IQR]                        | 1.008        | 0.989-1.027         |
| ALT, U/L, median [IQR]                        | 0.995        | 0.979-1.011         |
| GGT, U/L, median [IQR]                        | 1.0002       | 0.998-1.003         |
| Albumins, g/L, median [IQR]                   | <b>0.900</b> | <b>0.816-0.993</b>  |
| Child Pugh score, points, median [IQR]        | 1.792        | 0.883-3.638         |
| MELD, points, median [IQR]                    | 1.068        | 0.898-1.270         |
| FIB-4, points, median [IQR]                   | <b>1.731</b> | <b>1.146-2.612</b>  |
| APRI, points, median [IQR]                    | 2.173        | 0.894-5.284         |
| ALBI, points, median [IQR]                    | <b>3.539</b> | <b>1.237-10.124</b> |
| Spleen length, mm, median [IQR]               | <b>1.043</b> | <b>1.009-1.077</b>  |
| LSM, kPa, median [IQR]                        | <b>1.077</b> | <b>1.023-1.136</b>  |
| CAP, dB/m, median [IQR]                       | 0.997        | 0.989-1.005         |

**Supplementary table 3.** Univariate and multivariate logistic regression model assessing independent predictors associated with the SSM> 40.9 kPa (as the indicator of presence of critical varices) using new Fibroscan software (N=61). **Abbreviations:** ALBI: albumin-bilirubin score; ALT: alanine aminotransferase; AST: aspartate aminotransferase; APRI: AST to Platelet Ratio Index; BMI: body mass index; CAP: continuous attenuation parameter; dB/m: decibels per meter; CI: confidence interval; ECOG: Eastern Cooperative Oncology Group; FIB-4: Fibrosis-4; GGT: gamma glutamyl transferase; g/L: grams per liter; INR: international normalised ratio; IQR: interquartile range; kPa: kilopascal; LSM: liver stiffness measurement; M: median; MELD: model of end-stage liver disease; µmol/L: micromoles per liter; mmol/L: millimoles per liter; N: number; MASLD: Metabolic dysfunction-associated steatotic liver disease; PBC: primary biliary cholangitis; SSM: spleen stiffness measurement; U/L: units per liter

| <b>Dependent variable:<br/>SSM&gt;40.9 kPa</b> | <b>Odds ratio<br/>(univariate)</b> | <b>95% CI</b>       |
|------------------------------------------------|------------------------------------|---------------------|
| <b>Independent variables</b>                   |                                    |                     |
| Age, years, median [IQR]                       | 0.999                              | 0.952-1.049         |
| Age at time of diagnosis, years, median [IQR]  | 1.003                              | 0.955-1.054         |
| Male sex                                       | 3.158                              | 0.949-10.503        |
| BMI, kg/m <sup>2</sup> , median [IQR]          | 1.027                              | 0.927-1.138         |
| ECOG<br>0<br>1<br>2                            | Ref.<br>4.461<br>Not enough data   | 0.468-42.516        |
| Obesity (BMI>30 kg/m <sup>2</sup> )            | 1.467                              | 0.480-4.477         |
| Arterial hypertension                          | 0.818                              | 0.276-2.422         |
| Hyperlipidemia                                 | 1.055                              | 0.378-2.949         |
| Diabetes type II                               | 1.385                              | 0.500-3.835         |
| Charlson Comorbidity Index                     | <b>1.366</b>                       | <b>1.031-1.810</b>  |
| Etiology- Alcohol                              | 1.583                              | 0.573-4.378         |
| Etiology- MASLD                                | 0.875                              | 0.272-2.812         |
| Esophageal varices                             | <b>8.186</b>                       | <b>2.568-26.093</b> |
| Critical varices                               | Insufficient data                  |                     |
| Leukocytes, G/L, median [IQR]                  | 0.795                              | 0.617-1.025         |
| Neutrophils, G/L, median [IQR]                 | 0.837                              | 0.609-1.151         |

|                                                     |               |                            |
|-----------------------------------------------------|---------------|----------------------------|
| Lymphocytes, G/L,<br>median [IQR]                   | <b>0.186</b>  | <b>0.064-0.544</b>         |
| Neutrophile to<br>lymphocyte ratio,<br>median [IQR] | 1.372         | 0.922-2.042                |
| Hemoglobin, g/L<br>median [IQR]                     | <b>0.973</b>  | <b>0.948-0.998</b>         |
| Platelets, G/L,<br>median [IQR]                     | <b>0.979</b>  | <b>0.965-0.992</b>         |
| INR, median [IQR]                                   | <b>75.146</b> | <b>2.502-<br/>2256.494</b> |
| Bilirubin, $\mu\text{mol/L}$ ,<br>median [IQR]      | 1.005         | 0.987-1.024                |
| Creatinine, $\mu\text{mol/L}$ ,<br>median [IQR]     | 1.019         | 0.991-1.048                |
| Sodium, U/L,<br>median [IQR]                        | 0.969         | 0.809-1.163                |
| AST, U/L, median<br>[IQR]                           | 1.002         | 0.996-1.008                |
| ALT, U/L, median<br>[IQR]                           | 0.997         | 0.986-1.009                |
| GGT, U/L, median<br>[IQR]                           | 1.0001        | 0.998-1.002                |
| Albumins, g/L,<br>median [IQR]                      | <b>0.827</b>  | <b>0.736-0.928</b>         |
| Child Pugh score,<br>points, median<br>[IQR]        | 1.249         | 0.809-1.927                |
| MELD, points,<br>median [IQR]                       | 1.146         | 0.986-1.332                |
| FIB-4, points,<br>median [IQR]                      | <b>1.337</b>  | <b>1.069-1.674</b>         |
| APRI, points,<br>median [IQR]                       | 1.347         | 0.867-2.092                |
| ALBI, points, median<br>[IQR]                       | <b>4.659</b>  | <b>1.683-<br/>12.894</b>   |
| Spleen length, mm,<br>median [IQR]                  | <b>1.046</b>  | <b>1.015-1.078</b>         |
| LSM, kPa, median<br>[IQR]                           | <b>1.079</b>  | <b>1.033-1.127</b>         |
| CAP, dB/m, median<br>[IQR]                          | 0.996         | 0.986-1.007                |
